# Supplementary material
Source: PubMed Central journal article supplement (PMC3646523)
Supplement: NIHMS467015-supplement-1_si_001.pdf [file NIHMS467015-supplement-1_si_001.pdf]

# Supporting Information to: Dynamic Nuclear Polarization Study of Inhibitor Binding to the M2<sub>18-60</sub> Proton Transporter from Influenza A

*Loren B. Andreas<sup>1</sup>, Alexander B. Barnes<sup>1</sup>, Björn Corzilius<sup>1</sup>, James J. Chou<sup>2</sup>, Eric A.  
Miller<sup>1</sup>, Marc Caporini<sup>3</sup>, Melanie Rosay<sup>3</sup> and Robert G Griffin<sup>1\*</sup>*

<sup>1</sup> Francis Bitter Magnet Laboratory and Department of Chemistry

Massachusetts Institute of Technology

Cambridge, Massachusetts 02139

<sup>2</sup> Department of Biological Chemistry and Molecular Pharmacology

Harvard Medical School

Boston, MA 02115

<sup>3</sup> Bruker BioSpin Corporation

15 Fortune Drive

Billerica, MA 01821

\*rgg@mit.edu, 617-253-5597

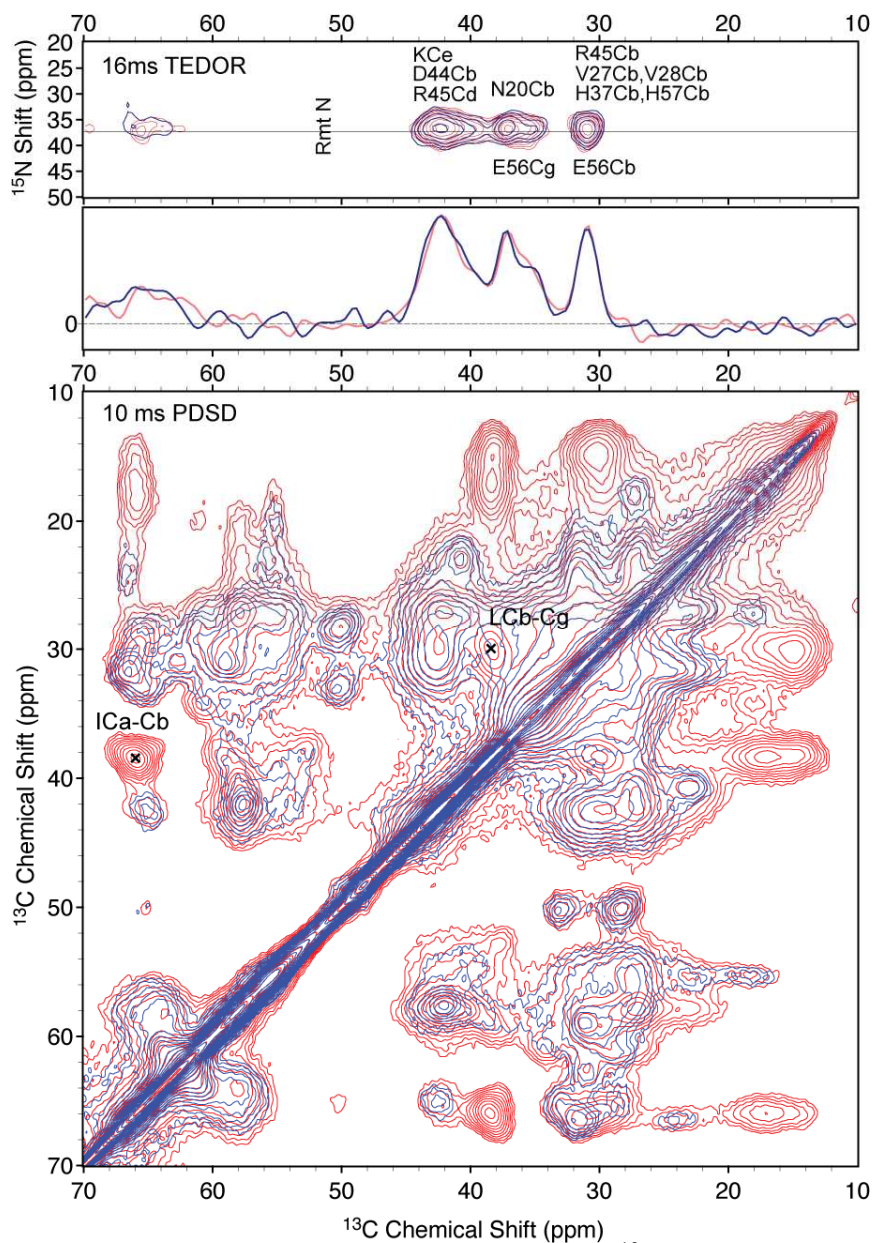

**Figure S1.** Top: 16 ms ZF-TEDOR spectra of  $^{13}\text{C}$ -ILFY reverse labeled M2 (blue) show identical crosspeaks as FY reverse labeled M2 (red). A 1D slice from the 2D spectrum is displayed. Bottom: A 10 ms PDSD spectrum demonstrates successful labeling for these samples since Ile and Leu cross peaks are absent from the blue spectrum. Spectra were

recorded at 400 MHz, 9009 kHz MAS, and a temperature of  $\sim 105$  K. D21G-D24G M2 was used, and  $^{15}\text{N}$  was incorporated into the backbone of the protein with  $^{15}\text{N}$  Leucine.

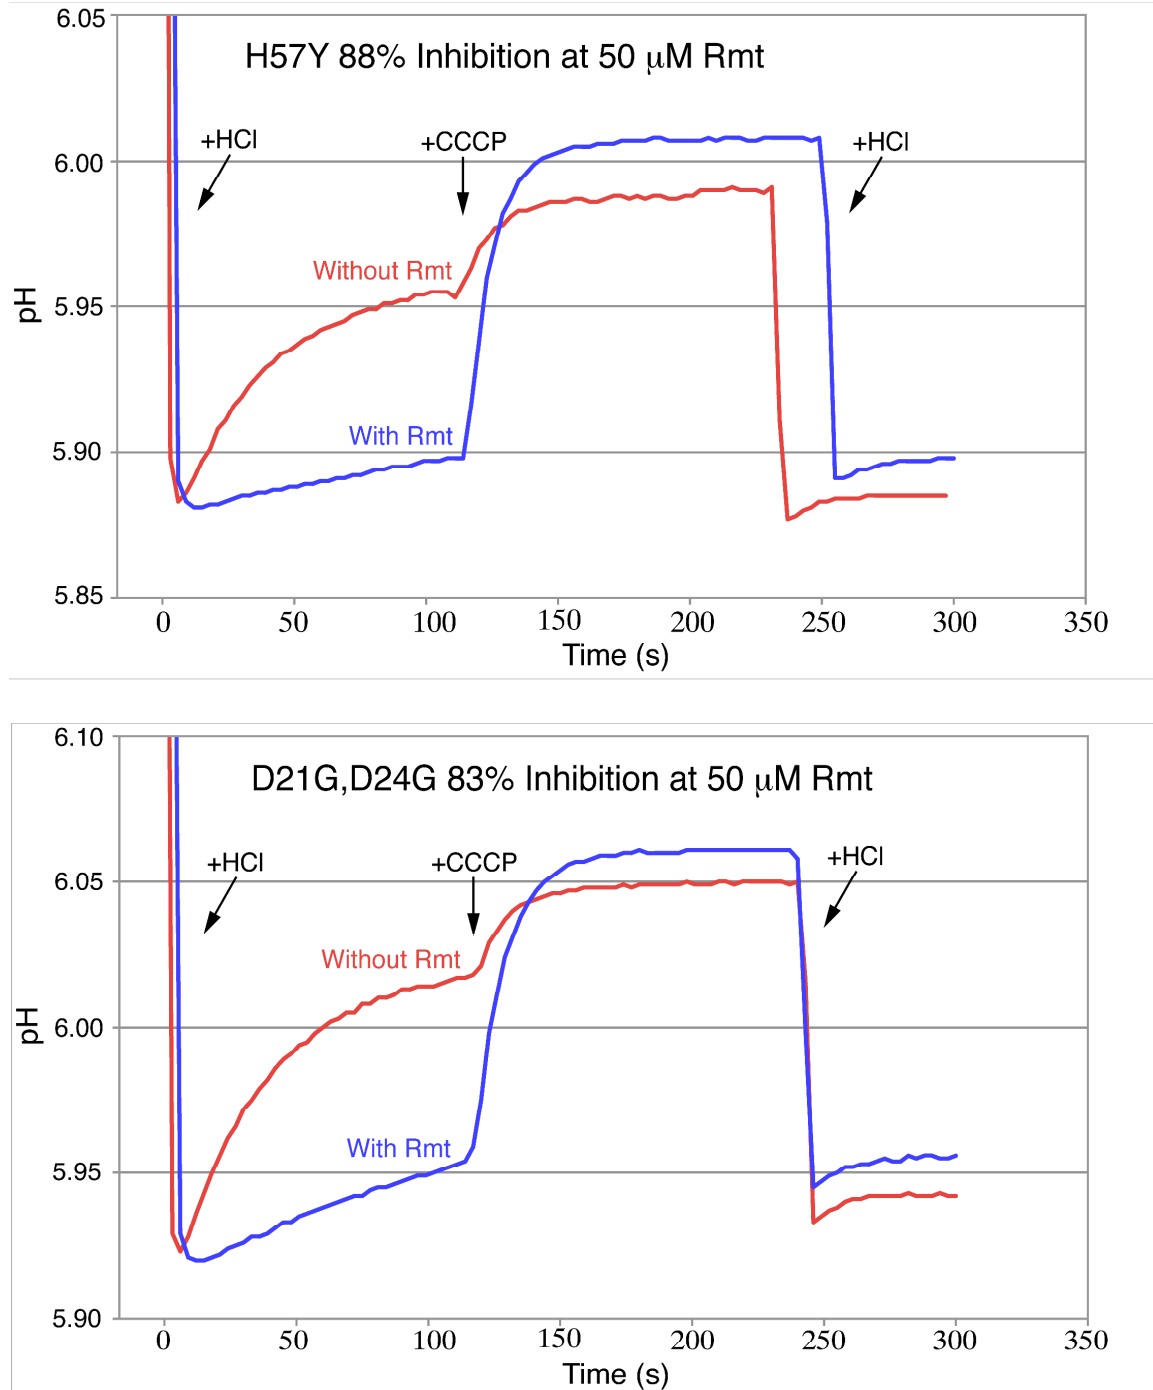

**Figure S2.** Channel current is measured indirectly by pH in a liposome assay described previously.<sup>(1)</sup> Briefly, M2 is prepared in liposomes, and the pH outside the liposomes is

measured as a function of time. Addition of HCl initiates channel conduction of protons into the liposomes, the initial slope of which is used as a measure of proton flux. The proton flux per channel was calculated using CCCP to equalize the pH inside and outside the liposome, followed by addition of a known amount of HCl to calculate the total buffering capacity. The D21G,D24G double mutant and the H57Y mutant are drug sensitive, with ~80-90% reduction in proton current in the presence of 50  $\mu$ M Rimantadine, similar to wild type protein.

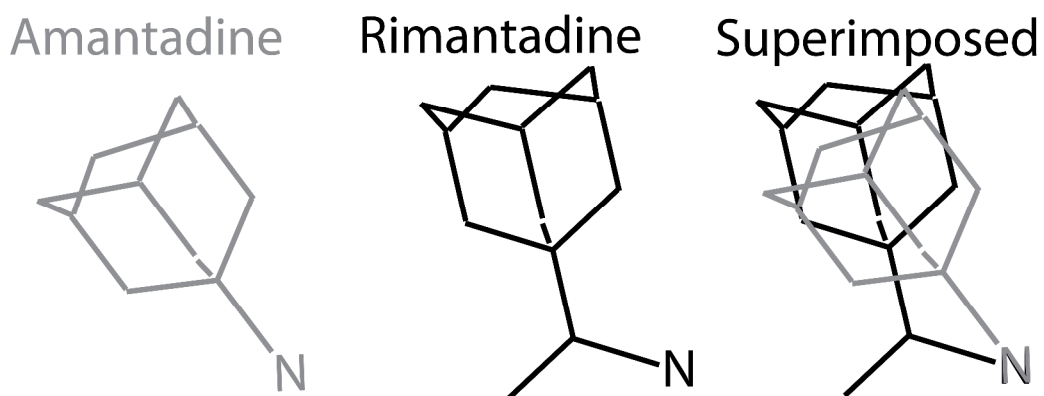

**Figure S3.** An illustration of the tilt angle measured by Hong and coworkers for Amantadine and Rimantadine(2, 3). Amantadine is tilted  $37^\circ$  from the bilayer normal, while Rimantadine is tilted by only  $13^\circ$ . In both cases, the amine and adamantyl ends of the molecule occupy similar positions relative to the membrane normal. The illustration was generated using a single internuclear distance and ideal angles of  $120^\circ$  for the projection of tetrahedral geometry in 2 dimensions.

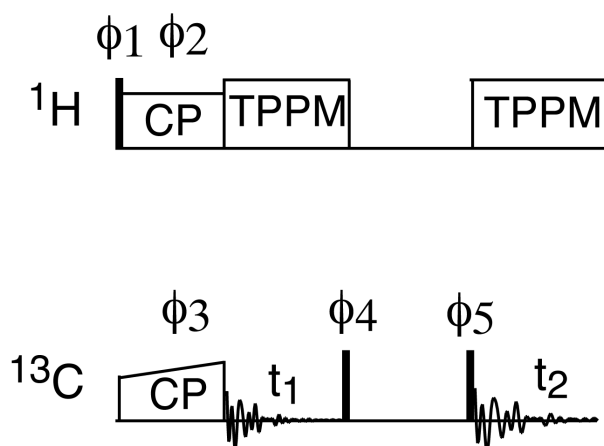

**Figure S4.** The Proton Driven Spin Diffusion (PDS) pulse program used in Figure 1 is depicted as previously described(4, 5). Narrow rectangles represent  $90^\circ$  pulses. A  $^1\text{H}$  flip and decoupling power level of 83 kHz was used. Two pulse phase modulation(6) (TPPM) was optimized with phases of 18 and 0 degrees, and a pulse length of 5.8  $\mu\text{s}$ . 83 kHz of  $^{13}\text{C}$  was used for flip pulses. Cross polarization (CP) was applied for 1.5 to 2 ms with constant irradiation at  $\sim 70$  kHz on  $^1\text{H}$  and with an optimized ramp on  $^{13}\text{C}$  centered at one rotor frequency below the proton nutation frequency. The phase cycle was:  $\phi_1 = 13$ ,  $\phi_2 = 2$ ,  $\phi_3 = 1133$ ,  $\phi_4 = 2$ ,  $\phi_5 = 1111\ 3333\ 2222\ 4444$ ,  $\phi_{\text{receiver}} = 2442\ 4224\ 3113\ 1331$ , where  $x=1$ ,  $y=2$ ,  $-x=3$ ,  $-y=4$ .

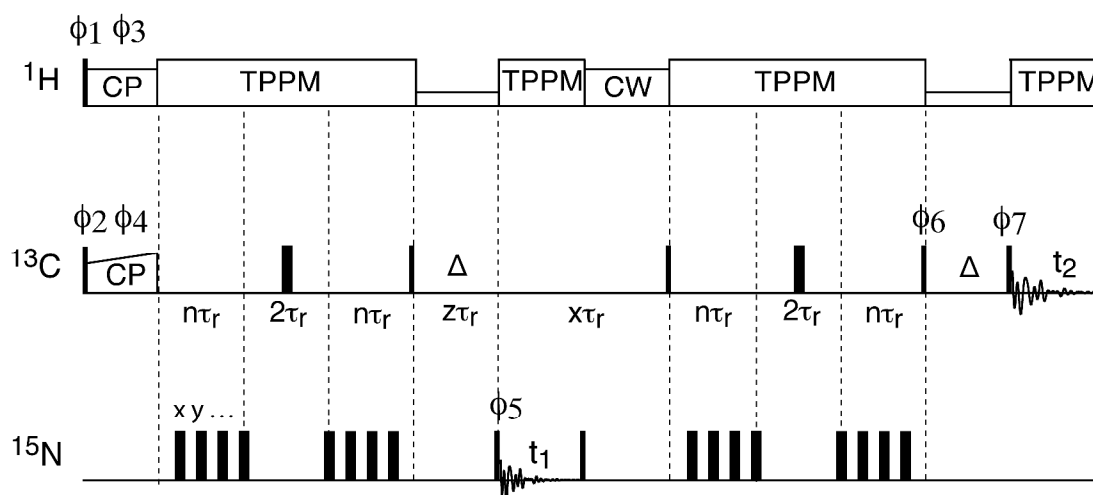

**Figure S5.** The z-filtered transferred echo double resonance (ZF-TEDOR) pulse program used in Figures 2-4 is depicted as previously described(7). Narrow rectangles represent 90° pulses, and broad rectangles represent 180° pulses. A <sup>1</sup>H flip and decoupling power level of 83 to 100 kHz was used during evolution, and ~100 kHz was applied during mixing. Two pulse phase modulation (TPPM) was optimized with phases of 18 and 0 degrees, and a pulse length of 5.8 μs (83 kHz) or 4.8 μs (100 kHz). 50 to 83 kHz of <sup>13</sup>C was used for flip pulses. A power level of 20 to 40 kHz was typical for flip pulses on the <sup>15</sup>N channel. At 278 K, cross polarization (CP) was applied for 1.5 to 2 ms with constant irradiation at ~70 kHz on <sup>1</sup>H and with an optimized ramp on <sup>13</sup>C centered at one rotor frequency below the proton nutation frequency. At low temperature, 0.9 ms of CP was used. The phase cycle was:  $\phi_1 = 16x(1) 16x(3)$ ,  $\phi_2 = 16x(4) 16x(2)$ ,  $\phi_3 = 2$ ,  $\phi_4 = 1$ ,  $\phi_5 = 13$ ,  $\phi_6 = 2244$ ,  $\phi_7 = 1111 2222 3333 4444$ ,  $\phi_{\text{receiver}} = 4224 1331 2442 3113 2442 3113 4224 1331$ , where  $x=1$ ,  $y=2$ ,  $-x=3$ ,  $-y=4$ . The initial flip pulse on the <sup>13</sup>C channel was omitted for spectra acquired at ~100 K. Rotor synchronization is indicated under the <sup>13</sup>C channel in the figure. Mixing times ( $4n\tau_r$ ) are indicated in the manuscript. Z-filters of 2 to 4 rotor periods were sufficient to suppress unwanted coherences.

1. Pielak, R. M., Schnell, J. R., and Chou, J. J. (2009) Mechanism of drug inhibition and drug resistance of influenza A M2 channel, *Proc Natl Acad Sci U S A* 106, 7379-7384.
2. Cady, S. D., Wang, J., Wu, Y., DeGrado, W. F., and Hong, M. (2011) Specific binding of adamantane drugs and direction of their polar amines in the pore of the influenza M2 transmembrane domain in lipid bilayers and

- dodecylphosphocholine micelles determined by NMR spectroscopy, *J Am Chem Soc* 133, 4274-4284.
3. Cady, S. D., Schmidt-Rohr, K., Wang, J., Soto, C. S., DeGrado, W. F., and Hong, M. (2010) Structure of the amantadine binding site of influenza M2 proton channels in lipid bilayers, *Nature* 463, 689.
  4. Szeverenyi, N. M., Bax, A., and Maciel, G. E. (1983) Proton-Exchange Rates in Solid Tropolone As Measured via  $^{13}\text{C}$  CP/MAS NMR, *J Am Chem Soc* 105, 2579-2582.
  5. Szeverenyi, N. M., Sullivan, M. J., and Maciel, G. E. (1982) Observation of Spin Exchange by Two-Dimensional Fourier Transform  $^{13}\text{C}$  Cross Polarization-Magic-Angle-Spinning, *J Mag Res* 47, 462-475.
  6. Bennett, A. E., Rienstra, C. M., Auger, M., Lakshmi, K. V., and Griffin, R. G. (1995) Heteronuclear Decoupling in Rotating Solids, *Journal of Chemical Physics* 103, 6951-6958.
  7. Jaroniec, C. P., Filip, C., and Griffin, R. G. (2002) 3D TEDOR NMR experiments for the simultaneous measurement of multiple carbon-nitrogen distances in uniformly  $(^{13}\text{C}, ^{15}\text{N})$ -labeled solids, *J Am Chem Soc* 124, 10728-10742.
